# Supplementary material for: Selective CO hydrogenation of cinnamaldehyde over Ir-based catalysts and its comparison with C–O hydrogenolysis of polyols
Source: Royal Society of Chemistry journal article supplement (doi:10.1039/d5cy00087d), 2025-01-01
Supplement: d5cy00087d1.pdf [file d5cy00087d1.pdf]

## Supplementary Material

### **Selective C=O hydrogenation of cinnamaldehyde over Ir-based catalysts and the comparison with C-O hydrogenolysis of polyols**

*Zhe Dong<sup>a</sup>, Yoshinao Nakagawa<sup>a, b</sup>, Ben Liu<sup>a</sup>, Shogen Mihara<sup>a</sup>, Mizuho Yabushita<sup>a, b</sup>, Keiichi Tomishige<sup>a, b, c</sup>*

AUTHOR ADDRESS <sup>a</sup>Department of Applied Chemistry, School of Engineering, Tohoku University, 6-6-07 Aoba, Aramaki, Aoba-ku, Sendai 980-8579, Japan;

<sup>b</sup>Research Center for Rare Metal and Green Innovation, Tohoku University, 468-1, Aoba, Aramaki, Aoba-ku, Sendai 980-0845, Japan;

<sup>c</sup>Advanced Institute for Materials Research (WPI-AIMR), Tohoku University, Katahira 2-1-1, Aoba-ku, Sendai 980-8577, Japan

Email: [yoshinao@erec.che.tohoku.ac.jp](mailto:yoshinao@erec.che.tohoku.ac.jp) (Y.N.); [tomishige@tohoku.ac.jp](mailto:tomishige@tohoku.ac.jp) (K.T.)

**Table S1.** The precursors, supports, and reagents used in this research

| Precursors or reagents                                                             | Details of the chemicals                                                       |
|------------------------------------------------------------------------------------|--------------------------------------------------------------------------------|
| H <sub>2</sub> IrCl <sub>6</sub>                                                   | Furuya Metals Co., Ltd.                                                        |
| SiO <sub>2</sub>                                                                   | G6, Fuji Silysia, calcined at 973 K for 1 h, 485 m <sup>2</sup> /g             |
| Anatase TiO <sub>2</sub>                                                           | FUJIFILM Wako Pure Chemical Co., 13 m <sup>2</sup> /g                          |
| Rutile TiO <sub>2</sub>                                                            | FUJIFILM Wako Pure Chemical Co., 6.8 m <sup>2</sup> /g                         |
| P25 TiO <sub>2</sub>                                                               | Nippon Aerosil, 50 m <sup>2</sup> /g                                           |
| BN                                                                                 | FUJIFILM Wako Pure Chemical Co., 5.8 m <sup>2</sup> /g                         |
| CeO <sub>2</sub>                                                                   | Daiichi Kigenso Co., Ltd., HS, calcined at 873 K for 1 h, 84 m <sup>2</sup> /g |
| TiC                                                                                | FUJIFILM Wako Pure Chemical Co.                                                |
| TiN                                                                                | FUJIFILM Wako Pure Chemical Co.                                                |
| MgO                                                                                | FUJIFILM Wako Pure Chemical Co.                                                |
| Co <sub>3</sub> O <sub>4</sub>                                                     | FUJIFILM Wako Pure Chemical Co.                                                |
| SnO <sub>2</sub>                                                                   | FUJIFILM Wako Pure Chemical Co.                                                |
| MnO <sub>2</sub>                                                                   | FUJIFILM Wako Pure Chemical Co.                                                |
| Fe(NO <sub>3</sub> ) <sub>3</sub> ·9H <sub>2</sub> O                               | FUJIFILM Wako Pure Chemical Co.                                                |
| Co(NO <sub>3</sub> ) <sub>3</sub> ·6H <sub>2</sub> O                               | FUJIFILM Wako Pure Chemical Co.                                                |
| NH <sub>4</sub> ReO <sub>4</sub>                                                   | FUJIFILM Wako Pure Chemical Co.                                                |
| Ni(NO <sub>3</sub> ) <sub>2</sub> ·6H <sub>2</sub> O                               | FUJIFILM Wako Pure Chemical Co.                                                |
| NbO(NO <sub>3</sub> ) <sub>3</sub>                                                 | FUJIFILM Wako Pure Chemical Co.                                                |
| (NH <sub>4</sub> ) <sub>6</sub> W <sub>7</sub> O <sub>24</sub> ·6H <sub>2</sub> O  | FUJIFILM Wako Pure Chemical Co.                                                |
| (NH <sub>4</sub> ) <sub>6</sub> Mo <sub>7</sub> O <sub>24</sub> ·4H <sub>2</sub> O | FUJIFILM Wako Pure Chemical Co.                                                |
| Pt(NH <sub>3</sub> ) <sub>4</sub> (NO <sub>3</sub> ) <sub>2</sub>                  | FUJIFILM Wako Pure Chemical Co.                                                |
| Pd(NO <sub>3</sub> ) <sub>2</sub>                                                  | FUJIFILM Wako Pure Chemical Co.                                                |
| RuNO(NO <sub>3</sub> ) <sub>3</sub>                                                | FUJIFILM Wako Pure Chemical Co.                                                |
| RhCl <sub>3</sub> ·3H <sub>2</sub> O                                               | FUJIFILM Wako Pure Chemical Co.                                                |
| HAuCl <sub>4</sub> ·4H <sub>2</sub> O                                              | FUJIFILM Wako Pure Chemical Co.                                                |
| Cinnamaldehyde                                                                     | Tokyo Chemical Industries, Ltd.                                                |
| Crotonaldehyde                                                                     | Tokyo Chemical Industries, Ltd.                                                |
| 1,4-dioxane                                                                        | FUJIFILM Wako Pure Chemical Co.                                                |

**Table S2.** Cinnamaldehyde hydrogenation over Ir/rutile with different Ir loading amounts

| Entry | Loading amount (wt%) | Conv. (%) | Selectivity (%) <sup>a</sup>                                                      |                                                                                   |                                                                                    |        | TOF <sub>m</sub> (h <sup>-1</sup> ) | C.B. (%) |
|-------|----------------------|-----------|-----------------------------------------------------------------------------------|-----------------------------------------------------------------------------------|------------------------------------------------------------------------------------|--------|-------------------------------------|----------|
|       |                      |           | 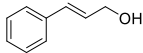 |  |  | Others |                                     |          |
| 1     | 0.5                  | 1         | 73 (0.7)                                                                          | 20                                                                                | 6                                                                                  | 1      | 14                                  | 99       |
| 2     | 1                    | 2         | 83 (1.7)                                                                          | 9                                                                                 | 7                                                                                  | 1      | 17                                  | 99       |
| 3     | 3                    | 8         | 95 (7.6)                                                                          | 5                                                                                 | 0                                                                                  | 0      | 23                                  | 104      |
| 4     | 4                    | 6         | 97 (5.8)                                                                          | 3                                                                                 | 0                                                                                  | 0      | 13                                  | 101      |
| 5     | 5                    | 6         | 96 (5.7)                                                                          | 4                                                                                 | 0                                                                                  | 0      | 11                                  | 100      |
| 6     | 6                    | 5         | 95 (4.8)                                                                          | 5                                                                                 | 0                                                                                  | 0      | 7                                   | 102      |
| 7     | 8                    | 6         | 88 (5.3)                                                                          | 5                                                                                 | 6                                                                                  | 1      | 6                                   | 103      |

Reaction conditions: catalyst = 50 mg; substrate: cinnamaldehyde = 6 mmol; solvent: H<sub>2</sub>O = 5 g; reaction temperature = 303 K; reaction time = 2.5 h; H<sub>2</sub> pressure = 0.8 MPa. The catalysts were pretreated before the reaction with liquid phase reduction (8 MPa H<sub>2</sub>, 473 K in the autoclave).

<sup>a</sup>Yields (%) of cinnamyl alcohol are given in the parentheses.

**Table S3.** Detailed data of cinnamaldehyde hydrogenation over Ir-MO<sub>x</sub>/rutile (Ir: 3 wt%, Fe/Ir = 0.1) (**Figure 1 (a)**)

| Entry | Additive metals  | Conv. (%) | Selectivity (%) <sup>a</sup>                                                      |                                                                                   |                                                                                    |        | TOF <sub>m</sub> (h <sup>-1</sup> ) | C.B. (%) |
|-------|------------------|-----------|-----------------------------------------------------------------------------------|-----------------------------------------------------------------------------------|------------------------------------------------------------------------------------|--------|-------------------------------------|----------|
|       |                  |           | 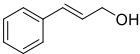 |  |  | Others |                                     |          |
| 1     | None             | 8         | 95 (8)                                                                            | 5                                                                                 | 0                                                                                  | 0      | 23                                  | 104      |
| 2     | Fe               | 41        | 98 (40)                                                                           | 1                                                                                 | 1                                                                                  | 0      | 153 <sup>b</sup>                    | 98       |
| 3     | Re               | 8         | 92 (7)                                                                            | 3                                                                                 | 5                                                                                  | 0      | 57                                  | 102      |
| 4     | Mo               | 8         | 92 (7)                                                                            | 3                                                                                 | 4                                                                                  | 1      | 57                                  | 102      |
| 5     | Ni               | 2         | 67 (1)                                                                            | 33                                                                                | 0                                                                                  | 0      | 7.6                                 | 103      |
| 6     | Co               | 21        | 77 (16)                                                                           | 18                                                                                | 4                                                                                  | 1      | 123                                 | 95       |
| 7     | W                | 22        | 97 (21)                                                                           | 2                                                                                 | 1                                                                                  | 0      | 169                                 | 100      |
| 8     | Without catalyst | 0.5       | 96 (0.48)                                                                         | 4                                                                                 | 0                                                                                  | 0      | -                                   | 105      |

Reaction conditions: catalyst = 50 mg; substrate: cinnamaldehyde = 6 mmol; solvent: H<sub>2</sub>O = 5 g; reaction temperature = 303 K; reaction time = 2.5 h; H<sub>2</sub> pressure = 0.8 MPa. The catalysts were pretreated before the reaction with liquid phase reduction (8 MPa H<sub>2</sub>, 473 K in the autoclave).

<sup>a</sup>Yields (%) of cinnamyl alcohol are given in the parentheses.

<sup>b</sup>The value of TOF was calculated by the data with 1 h reaction.

**Table S4.** The detail data of selective hydrogenation over Ir-M'O<sub>x</sub>/rutile (Ir: 3 wt%, M' = Fe or Re, different molar ratio) (**Figure 1 (b)**)

| Entry | Catalyst                                | M/Ir ratio | Conv. (%) | Selectivity (%) <sup>a</sup>                                                      |                                                                                   |                                                                                    |        | TOF <sub>m</sub> (h <sup>-1</sup> ) | C.B. (%) |
|-------|-----------------------------------------|------------|-----------|-----------------------------------------------------------------------------------|-----------------------------------------------------------------------------------|------------------------------------------------------------------------------------|--------|-------------------------------------|----------|
|       |                                         |            |           | 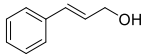 |  |  | Others |                                     |          |
| 1     | Ir-                                     | 0          | 8         | 95 (7.6)                                                                          | 5                                                                                 | 0                                                                                  | 0      | 23                                  | 104      |
| 2     | FeO <sub>x</sub> /rutile                | 0.01       | 5         | 95 (5)                                                                            | 0                                                                                 | 5                                                                                  | 1      | 16                                  | 102      |
| 3     | (Ir: 3 wt%)                             | 0.03       | 17        | 95 (16)                                                                           | 3                                                                                 | 2                                                                                  | 0      | 50                                  | 103      |
| 4     |                                         | 0.05       | 25        | 96 (24)                                                                           | 2                                                                                 | 2                                                                                  | 0      | 75                                  | 100      |
| 5     |                                         | 0.08       | 30        | 97 (29)                                                                           | 2                                                                                 | 1                                                                                  | 0      | 89                                  | 101      |
| 6     |                                         | 0.1        | 41        | 98 (40)                                                                           | 1                                                                                 | 1                                                                                  | 0      | 153 <sup>b</sup>                    | 98       |
| 7     |                                         | 0.25       | 38        | 98 (37)                                                                           | 1                                                                                 | 1                                                                                  | 0      | 117                                 | 105      |
| 8     |                                         | 0.3        | 33        | 96 (32)                                                                           | 2                                                                                 | 1                                                                                  | 1      | 101                                 | 101      |
| 9     |                                         | 0.5        | 22        | 97 (21)                                                                           | 2                                                                                 | 1                                                                                  | 0      | 68                                  | 103      |
| 10    |                                         | 1          | 14        | 97 (14)                                                                           | 0                                                                                 | 3                                                                                  | 0      | 43                                  | 104      |
| 11    | Ir-                                     | 0.1        | 8         | 91 (7)                                                                            | 3                                                                                 | 5                                                                                  | 1      | 23                                  | 102      |
| 12    | ReO <sub>x</sub> /rutile<br>(Ir: 3 wt%) | 0.25       | 35        | 97 (34)                                                                           | 1                                                                                 | 2                                                                                  | 0      | 108                                 | 102      |
| 13    |                                         | 0.5        | 28        | 96 (27)                                                                           | 2                                                                                 | 2                                                                                  | 0      | 86                                  | 105      |

Reaction conditions: catalyst = 50 mg; substrate: cinnamaldehyde = 6 mmol; solvent: H<sub>2</sub>O = 5 g; reaction temperature = 303 K; reaction time = 2.5 h; H<sub>2</sub> pressure = 0.8 MPa. The catalysts were pretreated before the reaction with liquid phase reduction (8 MPa H<sub>2</sub>, 473 K in the autoclave).

<sup>a</sup>Yields (%) of cinnamyl alcohol are given in the parentheses.

<sup>b</sup>The value of TOF was calculated by the data with 1 h reaction.

**Table S5.** Detailed data of cinnamaldehyde hydrogenation over Ir-FeO<sub>x</sub>/support (Ir: 3 wt%, Fe/Ir = 0.1) catalysts (**Figure 2**)

| Entry | Support                        | Conv.<br>(%) | Selectivity (%) <sup>a</sup>                                                      |                                                                                   |                                                                                    |        | TOF <sub>m</sub><br>(h <sup>-1</sup> ) | C.B.<br>(%) |
|-------|--------------------------------|--------------|-----------------------------------------------------------------------------------|-----------------------------------------------------------------------------------|------------------------------------------------------------------------------------|--------|----------------------------------------|-------------|
|       |                                |              | 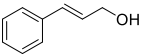 |  |  | Others |                                        |             |
| 1     | Rutile                         | 41           | 98 (40)                                                                           | 1                                                                                 | 1                                                                                  | 0      | 153 <sup>b</sup>                       | 98          |
| 2     | Anatase                        | 28           | 99 (28)                                                                           | 0                                                                                 | 1                                                                                  | 0      | 86                                     | 100         |
| 3     | P25                            | 22           | 96 (21)                                                                           | 4                                                                                 | 0                                                                                  | 0      | 65                                     | 103         |
| 4     | SiO <sub>2</sub>               | 34           | 98 (33)                                                                           | 1                                                                                 | 1                                                                                  | 0      | 104                                    | 110         |
| 5     | BN                             | 20           | 98 (20)                                                                           | 1                                                                                 | 1                                                                                  | 0      | 61                                     | 103         |
| 6     | MgO                            | 0            | 0 (0)                                                                             | 0                                                                                 | 0                                                                                  | 0      | -                                      | 100         |
| 7     | TiN                            | 2            | 99 (2)                                                                            | 1                                                                                 | 0                                                                                  | 0      | 6                                      | 104         |
| 8     | TiC                            | 0.4          | 95 (0.4)                                                                          | 4                                                                                 | 1                                                                                  | 0      | 1                                      | 102         |
| 9     | Co <sub>3</sub> O <sub>4</sub> | 12           | 64 (8)                                                                            | 27                                                                                | 8                                                                                  | 1      | 24                                     | 102         |
| 10    | MnO <sub>2</sub>               | 0            | 0 (0)                                                                             | 0                                                                                 | 0                                                                                  | 0      | -                                      | 100         |
| 11    | SnO <sub>2</sub>               | 0            | 0 (0)                                                                             | 0                                                                                 | 0                                                                                  | 0      | -                                      | 100         |
| 12    | CeO <sub>2</sub>               | 27           | 97 (26)                                                                           | 1                                                                                 | 2                                                                                  | 0      | 81                                     | 99          |

Reaction conditions: catalyst = 50 mg; substrate: cinnamaldehyde = 6 mmol; solvent: H<sub>2</sub>O = 5 g; reaction temperature = 303 K; reaction time = 2.5 h; H<sub>2</sub> pressure = 0.8 MPa. The catalysts were pretreated before the reaction with liquid phase reduction (8 MPa H<sub>2</sub>, 473 K in the autoclave).

<sup>a</sup>Yields (%) of cinnamyl alcohol are given in the parentheses.

<sup>b</sup>The value of TOF<sub>m</sub> was calculated by the data with 1 h reaction.

**Table S6.** Cinnamaldehyde hydrogenation over M-FeO<sub>x</sub>/rutile (M: 3 wt%, Fe/M = 0.1) catalysts

| Entry | Host metal (M') | Conv. (%) | Selectivity (%) <sup>a</sup>                                                      |                                                                                   |                                                                                    |        | TOF <sub>m</sub> (h <sup>-1</sup> ) | C.B. (%) |
|-------|-----------------|-----------|-----------------------------------------------------------------------------------|-----------------------------------------------------------------------------------|------------------------------------------------------------------------------------|--------|-------------------------------------|----------|
|       |                 |           | 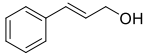 |  |  | Others |                                     |          |
| 1     | Ir              | 41        | 98 (40)                                                                           | 1                                                                                 | 1                                                                                  | 0      | 153 <sup>b</sup>                    | 98       |
| 2     | Ru              | 1         | 73 (0.7)                                                                          | 27                                                                                | 0                                                                                  | 0      | 2                                   | 102      |
| 3     | Rh              | 14        | 12 (2)                                                                            | 83                                                                                | 4                                                                                  | 1      | 36                                  | 100      |
| 4     | Au              | -         | -(0)                                                                              | -                                                                                 | -                                                                                  | -      | -                                   | 100      |
| 5     | Pt              | 27        | 83 (22)                                                                           | 12                                                                                | 4                                                                                  | 1      | 68                                  | 98       |
| 6     | Pd              | 56        | 1 (0.6)                                                                           | 57                                                                                | 41                                                                                 | 1      | -                                   | 91       |

Reaction conditions: catalyst = 50 mg; substrate: cinnamaldehyde = 6 mmol; solvent: H<sub>2</sub>O = 5 g; reaction temperature = 303 K; reaction time = 2.5 h; H<sub>2</sub> pressure = 0.8 MPa. The catalysts were pretreated before the reaction with liquid phase reduction (8 MPa H<sub>2</sub>, 473 K in the autoclave).

<sup>a</sup>Yields (%) of cinnamyl alcohol are given in the parentheses.

<sup>b</sup>The value of TOF<sub>m</sub> was calculated by the data with 1 h reaction.

**Table S7.** Detailed data of cinnamaldehyde hydrogenation over Ir-FeO<sub>x</sub>/rutile (Ir: x wt%, Fe/Ir = 0.1) catalysts (**Figure 3**)

| Entry | Ir loading amount (wt%) | Conv. (%) | Selectivity (%) <sup>a</sup>                                                      |                                                                                   |                                                                                    |        | TOF <sub>m</sub> (h <sup>-1</sup> ) | C.B. (%) |
|-------|-------------------------|-----------|-----------------------------------------------------------------------------------|-----------------------------------------------------------------------------------|------------------------------------------------------------------------------------|--------|-------------------------------------|----------|
|       |                         |           | 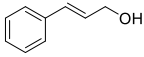 |  |  | Others |                                     |          |
| 1     | 1                       | 2         | 96 (2)                                                                            | 4                                                                                 | 0                                                                                  | 0      | 18                                  | 102      |
| 2     | 2                       | 17        | 96 (16)                                                                           | 2                                                                                 | 2                                                                                  | 0      | 78                                  | 105      |
| 3     | 3                       | 41        | 98 (40)                                                                           | 1                                                                                 | 1                                                                                  | 0      | 153 <sup>b</sup>                    | 98       |
| 4     | 4                       | 47        | 97 (46)                                                                           | 2                                                                                 | 1                                                                                  | 0      | -                                   | 103      |
| 5     | 5                       | 56        | 98 (55)                                                                           | 1                                                                                 | 1                                                                                  | 0      | -                                   | 102      |
| 6     | 6                       | 66        | 98 (65)                                                                           | 1                                                                                 | 1                                                                                  | 0      | -                                   | 103      |
| 7     | 8                       | 71        | 99 (70)                                                                           | 1                                                                                 | 0                                                                                  | 0      | -                                   | 104      |
| 8     | 10                      | 67        | 98 (66)                                                                           | 1                                                                                 | 1                                                                                  | 0      | -                                   | 100      |

Reaction conditions: catalyst = 50 mg; substrate: cinnamaldehyde = 6 mmol; solvent: H<sub>2</sub>O = 5 g; reaction temperature = 303 K; reaction time = 2.5 h; H<sub>2</sub> pressure = 0.8 MPa. The catalysts were pretreated before the reaction with liquid phase reduction (8 MPa H<sub>2</sub>, 473 K in the autoclave).

<sup>a</sup>Yields (%) of cinnamyl alcohol are given in the parentheses.

<sup>b</sup>The value of TOF<sub>m</sub> was calculated by the data with 1 h reaction.



**Table S8.** Summary of  $D_{\text{CO}}$  of the catalysts with various Ir loading amount, Fe/Ir ratio and support.

| Catalyst                                 | Ir loading amount (wt%) | Fe/Ir ratio | $D_{\text{co}}$ (%) <sup>a</sup> |
|------------------------------------------|-------------------------|-------------|----------------------------------|
| Ir/rutile                                | 3                       | 0           | 20                               |
| Ir/rutile <sup>b</sup>                   | 5                       | 0           | 14                               |
| Ir-FeO <sub>x</sub> /rutile              | 3                       | 0.1         | 22                               |
| Ir-FeO <sub>x</sub> /rutile              | 3                       | 0.25        | 23                               |
| Ir-FeO <sub>x</sub> /rutile              | 3                       | 0.5         | 19                               |
| Ir-FeO <sub>x</sub> /rutile <sup>b</sup> | 5                       | 0.25        | 13                               |
| Ir-FeO <sub>x</sub> /anatase             | 3                       | 0.1         | 12                               |
| Ir-FeO <sub>x</sub> /P25                 | 3                       | 0.1         | 11                               |
| Ir-FeO <sub>x</sub> /BN                  | 3                       | 0.1         | 10                               |
| Ir-FeO <sub>x</sub> /SiO <sub>2</sub>    | 3                       | 0.1         | 16                               |
| Ir-FeO <sub>x</sub> /CeO <sub>2</sub>    | 3                       | 0.1         | 48                               |

<sup>a</sup> $D_{\text{CO}}$  was calculated by the CO adsorption. The fresh catalysts were prereduced at 573 K for 1 h in the gas phase.

<sup>b</sup>Ref S1.

**Table S9.** 1,2-Butanediol hydrogenolysis over various Ir/TiO<sub>2</sub> and Ir-FeO<sub>x</sub>/TiO<sub>2</sub> catalysts.

| Catalyst                                                    | Ir loading amount (wt%) | Fe/Ir ratio | Conv. (%) | Selectivity (%) |         |        |          |         |         | C.B. (%) |
|-------------------------------------------------------------|-------------------------|-------------|-----------|-----------------|---------|--------|----------|---------|---------|----------|
|                                                             |                         |             |           | 1- BuOH         | 2- BuOH | Butane | 1- PrOH  | Methane | Propane |          |
|                                                             |                         |             |           |                 |         |        | +2- PrOH |         |         |          |
| Ir-FeO <sub>x</sub> /rutile                                 | 3                       | 0.1         | 4.6       | 7.7             | 71.7    | 9.5    | 9.6      | 1.5     | 0       | 101      |
| Ir-FeO <sub>x</sub> /rutile <sup>a</sup>                    | 5                       | 0.25        | 17.1      | 15.0            | 64.2    | 13.6   | 4.6      | 2.1     | 0.5     | 102      |
| Ir <sub>c-r</sub> -FeO <sub>x</sub> /rutile <sup>a, b</sup> | 5                       | 0.25        | 8.7       | 6.5             | 66.4    | 16.7   | 6.6      | 3.1     | 0.7     | 95       |
| Ir-FeO <sub>x</sub> /rutile                                 | 5                       | 0.1         | 5.5       | 4.1             | 76.5    | 7.1    | 9.7      | 2.7     | 0.0     | 94       |
| Ir/rutile                                                   | 3                       | 0           | 2.5       | 32.3            | 49.6    | 13.2   | 2.6      | 1.0     | 1.3     | 99       |
| Ir/rutile <sup>a</sup>                                      | 5                       | 0           | 7.5       | 27.5            | 53.0    | 14.4   | 2.1      | 1.3     | 1.5     | 99       |

<sup>a</sup>Ref S1.

<sup>b</sup>The catalyst prepared with the procedure involving calcination and reduction before loading of Fe.

Reaction conditions: catalyst = 200 mg substrate = 0.5 g; solvent: H<sub>2</sub>O = 4 g; H<sub>2</sub> pressure = 8 MPa; reaction temperature = 453 K, Reaction time = 24 h; H<sub>2</sub> pressure = 8 MPa.

**Table S10.** Cinnamaldehyde hydrogenation over Ir-FeO<sub>x</sub>/TiO<sub>2</sub> (Ir: 3 wt%) catalysts with different prerduction conditions (**Figure 4** square markers)

| Reduction method | Conv. (%) | Selectivity (%) <sup>a</sup>                                                      |                                                                                   |                                                                                    |        | TOF <sub>m</sub> (h <sup>-1</sup> ) | C.B. (%) |
|------------------|-----------|-----------------------------------------------------------------------------------|-----------------------------------------------------------------------------------|------------------------------------------------------------------------------------|--------|-------------------------------------|----------|
|                  |           | 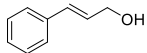 |  |  | Others |                                     |          |
| No reduction     | 9         | 88 (8)                                                                            | 12                                                                                | 0                                                                                  | 0      | 25                                  | 90       |
| L 473 K          | 41        | 97 (40)                                                                           | 1                                                                                 | 1                                                                                  | 1      | 153 <sup>b</sup>                    | 99       |
| G 473 K          | 4         | 93 (4)                                                                            | 7                                                                                 | 0                                                                                  | 0      | 12                                  | 103      |
| G 573 K          | 38        | 99 (38)                                                                           | 1                                                                                 | 0                                                                                  | 0      | 116                                 | 94       |
| G 673 K          | 26        | 98 (25)                                                                           | 2                                                                                 | 0                                                                                  | 0      | 76                                  | 94       |
| G 773 K          | 17        | 98 (17)                                                                           | 2                                                                                 | 0                                                                                  | 0      | 52                                  | 100      |
| G 873 K          | 18        | 99 (18)                                                                           | 1                                                                                 | 0                                                                                  | 0      | 55                                  | 101      |
| G 973 K          | 12        | 99 (12)                                                                           | 1                                                                                 | 0                                                                                  | 0      | 36                                  | 101      |

Reaction conditions: catalyst = 50 mg; substrate: cinnamaldehyde = 6 mmol; solvent: H<sub>2</sub>O = 5 g; reaction temperature = 303 K; reaction time = 2.5 h; H<sub>2</sub> pressure = 0.8 MPa. The catalysts were pretreated before the reaction with different reduction conditions: L: liquid phase reduction under 8 MPa for 1 h; G: gas phase reduction under flowing H<sub>2</sub> 30 mL/min (0.1 MPa) for 1 h.

<sup>a</sup>Yields (%) of cinnamyl alcohol are given in the parentheses.

<sup>b</sup>The value of TOF was calculated by the data with 1 h reaction.

**Table S11.** Detailed data of previous work of 1,2-Butanediol hydrogenolysis over Ir-FeO<sub>x</sub>/TiO<sub>2</sub> (Ir: 5 wt%, Fe/Ir = 0.25) catalyst [S1] (**Figure 4** circle markers).

| Catalyst                                                 | Reduction method          | Conv. (%) | Selectivity (%) |        |        |                   |         |         | C.B. (%) |
|----------------------------------------------------------|---------------------------|-----------|-----------------|--------|--------|-------------------|---------|---------|----------|
|                                                          |                           |           | 1-BuOH          | 2-BuOH | Butane | 1-PrOH<br>+2-PrOH | Methane | Propane |          |
| Ir-FeO <sub>x</sub> /rutile                              | No reduction <sup>b</sup> | 17.1      | 15.0            | 64.2   | 13.6   | 4.6               | 2.1     | 0.0     | 102      |
|                                                          | G, 473 K                  | 17.7      | 12.3            | 66.3   | 14.4   | 4.5               | 2.1     | 0.0     | 103      |
|                                                          | G, 573 K                  | 14.6      | 13.0            | 65.0   | 15.9   | 3.8               | 1.8     | 0.5     | 102      |
|                                                          | G, 673 K                  | 19.3      | 15.9            | 63.4   | 16.0   | 3.0               | 1.3     | 0.4     | 102      |
|                                                          | G, 773 K                  | 13.1      | 9.2             | 63.3   | 19.0   | 5.5               | 2.5     | 0.4     | 103      |
| Ir <sub>c-r</sub> -FeO <sub>x</sub> /rutile <sup>a</sup> | No reduction <sup>b</sup> | 8.7       | 6.5             | 66.4   | 16.7   | 6.6               | 3.1     | 0.7     | 95       |

<sup>a</sup>The catalyst prepared with the procedure involving calcination and reduction before loading of Fe.

<sup>b</sup>The catalysts without reduction was shown as red marker in **Figure 4**

Reaction conditions: catalyst = 200 mg; substrate = 0.5 g; solvent: H<sub>2</sub>O = 4 g; H<sub>2</sub> pressure = 8 MPa; reaction temperature = 453 K, Reaction time = 24 h. The catalysts were pretreated before the reaction with different reduction conditions: G: gas phase reduction under flowing H<sub>2</sub> 30 mL/min (0.1 MPa) for 1 h.

**Table S12.** Detailed data of time course of cinnamaldehyde hydrogenation over Ir-FeO<sub>x</sub>/rutile (Ir: 3 wt%, Fe/Ir = 0.1) catalyst (**Figure 5**)

| Entry | Catalyst                                                   | Reaction Time (h) | Conv. (%) | Selectivity (%) <sup>a</sup>                                                      |                                                                                    |                                                                                     |        | C.B. (%) |
|-------|------------------------------------------------------------|-------------------|-----------|-----------------------------------------------------------------------------------|------------------------------------------------------------------------------------|-------------------------------------------------------------------------------------|--------|----------|
|       |                                                            |                   |           | 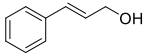 |  |  | Others |          |
| 1     | Ir-FeO <sub>x</sub> /rutile<br>(Ir: 3 wt%,<br>Fe/Ir = 0.1) | 0                 | 4         | 97 (4)                                                                            | 3                                                                                  | 0                                                                                   | 0      | 100      |
| 2     |                                                            | 0.3               | 9         | 97 (9)                                                                            | 3                                                                                  | 0                                                                                   | 0      | 100      |
| 3     |                                                            | 0.5               | 18        | 97 (17)                                                                           | 2                                                                                  | 1                                                                                   | 0      | 100      |
| 4     |                                                            | 1                 | 20        | 97 (20)                                                                           | 2                                                                                  | 1                                                                                   | 0      | 104      |
| 5     |                                                            | 2.5               | 41        | 97 (40)                                                                           | 1                                                                                  | 1                                                                                   | 1      | 99       |
| 6     |                                                            | 6                 | 78        | 98 (76)                                                                           | 2                                                                                  | 1                                                                                   | 1      | 90       |
| 7     |                                                            | 8                 | 88        | 98 (86)                                                                           | 2                                                                                  | 0                                                                                   | 0      | 96       |
| 8     |                                                            | 12                | 91        | 97 (88)                                                                           | 2                                                                                  | 1                                                                                   | 0      | 100      |
| 9     |                                                            | 16                | 96        | 98 (94)                                                                           | 2                                                                                  | 0                                                                                   | 0      | 100      |
| 10    |                                                            | 24                | 97        | 88 (85)                                                                           | 1                                                                                  | 10                                                                                  | 1      | 102      |
| 11    |                                                            | 48                | 98        | 86 (84)                                                                           | 1                                                                                  | 12                                                                                  | 1      | 99       |
| 12    | Ir/rutile<br>(Ir: 3 wt%)                                   | 0                 | 1         | 84 (0.8)                                                                          | 15                                                                                 | 0                                                                                   | 1      | 99       |
| 13    |                                                            | 1                 | 3         | 92 (2)                                                                            | 7                                                                                  | 0                                                                                   | 1      | 100      |
| 14    |                                                            | 2.5               | 8         | 95 (7.6)                                                                          | 5                                                                                  | 0                                                                                   | 0      | 104      |
| 15    |                                                            | 4                 | 12        | 94 (11)                                                                           | 5                                                                                  | 1                                                                                   | 1      | 105      |
| 16    |                                                            | 8                 | 15        | 95 (14)                                                                           | 4                                                                                  | 1                                                                                   | 0      | 99       |
| 17    |                                                            | 18                | 24        | 95 (23)                                                                           | 3                                                                                  | 1                                                                                   | 1      | 99       |
| 18    |                                                            | 24                | 38        | 94 (36)                                                                           | 4                                                                                  | 1                                                                                   | 1      | 98       |
| 19    |                                                            | 48                | 52        | 95 (49)                                                                           | 4                                                                                  | 1                                                                                   | 0      | 99       |
| 20    |                                                            | 72                | 71        | 95 (68)                                                                           | 3                                                                                  | 1                                                                                   | 1      | 95       |

Reaction conditions: catalyst = 50 mg; substrate: cinnamaldehyde = 6 mmol; solvent: H<sub>2</sub>O = 5 g; reaction temperature = 303 K; reaction time = 2.5 h; H<sub>2</sub> pressure = 0.8 MPa. The catalysts were pretreated before the reaction with liquid phase reduction (8 MPa H<sub>2</sub>, 473 K in the autoclave).

<sup>a</sup>Yields (%) of cinnamyl alcohol are given in the parentheses.

**Table S13.** Detail data of the time course of Ir-FeO<sub>x</sub>/rutile (Ir: 3 wt%, Fe/Ir = 0.1) catalyst for various substrate

| Entry | Substrate                                                                           | Product                                                                             | Reaction time (h) | Conv. (%) | Yield (%) | Selectivity (%) |
|-------|-------------------------------------------------------------------------------------|-------------------------------------------------------------------------------------|-------------------|-----------|-----------|-----------------|
| 1     | 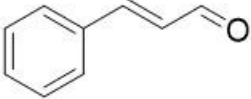   |    | 1                 | 23        | 20        | 97              |
| 2     |                                                                                     |                                                                                     | 2.5               | 39        | 41        | 96              |
| 3     |                                                                                     |                                                                                     | 8                 | 78        | 82        | 99              |
| 4     |                                                                                     |                                                                                     | 12                | 91        | 88        | 97              |
| 5     |                                                                                     |                                                                                     | 16                | 96        | 94        | 98              |
| 6     |    |    | 2.5               | 33        | 43        | 96              |
| 7     |                                                                                     |                                                                                     | 8                 | 67        | 76        | 94              |
| 8     |                                                                                     |                                                                                     | 12                | 95        | 90        | 95              |
| 9     |  |  | 2.5               | 43        | 45        | >99             |
| 10    |                                                                                     |                                                                                     | 8                 | 95        | 93        | >99             |
| 11    |                                                                                     |                                                                                     | 12                | 99        | 99        | >99             |

Reaction conditions: catalyst = 50 mg; substrate = 6 mmol; solvent: H<sub>2</sub>O = 5 g; reaction temperature = 303 K; reaction time = 2.5 h, H<sub>2</sub> pressure = 0.8 MPa. The catalysts were pretreated before the reaction with liquid phase reduction (8 MPa H<sub>2</sub>, 473 K in the autoclave).

**Table S14.** Detail data of the reuse test of Ir-FeO<sub>x</sub>/rutile (Ir: 3 wt%, Fe/Ir = 0.1) catalyst for cinnamaldehyde hydrogenation (**Figure 6**)

| Entry | Reuse times | Conv. (%) | Selectivity (%) <sup>a</sup>                                                      |                                                                                   |                                                                                    |        | TOF <sub>m</sub> (h <sup>-1</sup> ) | C.B. (%) |
|-------|-------------|-----------|-----------------------------------------------------------------------------------|-----------------------------------------------------------------------------------|------------------------------------------------------------------------------------|--------|-------------------------------------|----------|
|       |             |           | 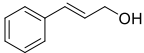 |  |  | Others |                                     |          |
| 1     | Fresh       | 38        | 97 (37)                                                                           | 2                                                                                 | 1                                                                                  | 0      | 113                                 | 98       |
| 2     | 1           | 37        | 97 (36)                                                                           | 1                                                                                 | 1                                                                                  | 1      | 111                                 | 100      |
| 3     | 2           | 37        | 98 (36)                                                                           | 2                                                                                 | 0                                                                                  | 0      | 111                                 | 90       |
| 4     | 3           | 37        | 99 (37)                                                                           | 1                                                                                 | 0                                                                                  | 0      | 113                                 | 94       |
| 5     | 4           | 35        | 99 (35)                                                                           | 1                                                                                 | 0                                                                                  | 0      | 108                                 | 103      |

Reaction conditions: catalyst = 50 mg; substrate: cinnamaldehyde = 6 mmol; solvent: H<sub>2</sub>O = 5 g; reaction temperature = 303 K; reaction time = 2.5 h; H<sub>2</sub> pressure = 0.8 MPa. The catalysts were pretreated before the reaction with liquid phase reduction (8 MPa H<sub>2</sub>, 473 K in the autoclave).

Reuse method: The catalyst after each run was separated from the reaction system by centrifugation, washed by H<sub>2</sub>O and ethanol for 4 times respectively, dried at 383 K overnight, and directly used for the next run.

<sup>a</sup>Yields (%) of cinnamyl alcohol are given in the parentheses.



**Table S15.** Leached amount of Ir and Fe after the cinnamaldehyde hydrogenation from Ir-FeO<sub>x</sub>/rutile (Ir= 3 wt%, Fe/Ir = 0.1) after reuse test, determined by ICP-OES

| Reuse times | Leached amount (%) |     |
|-------------|--------------------|-----|
|             | Ir                 | Fe  |
| 0           | < 0.1              | 0.4 |
| 1           | < 0.1              | 0.3 |
| 2           | < 0.1              | 0.3 |
| 3           | < 0.1              | 0.3 |
| 4           | < 0.1              | 0.2 |

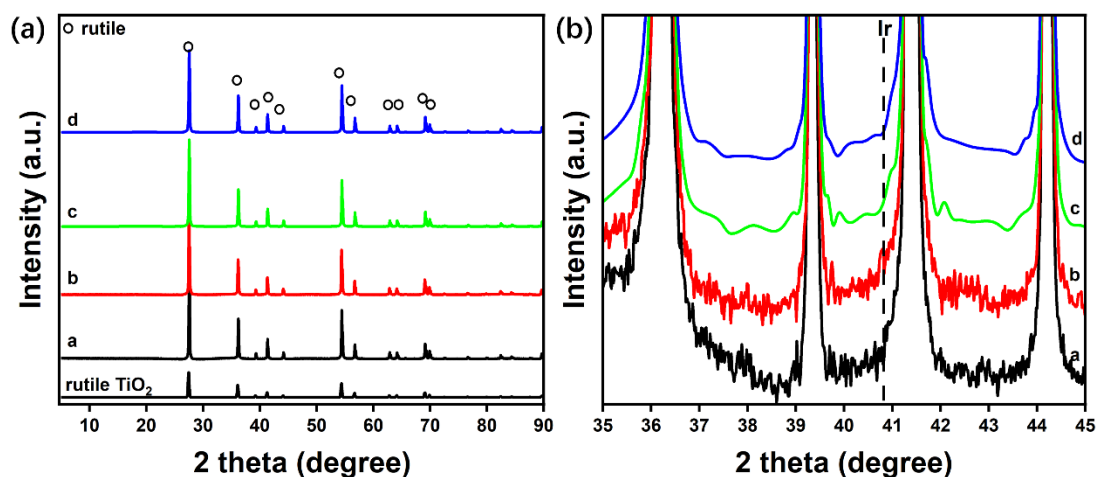

**Figure S1.** (a) XRD patterns ( $10^{\circ}$ - $75^{\circ}$ ) for **a.** Ir/rutile (Ir: 3 wt%), **b.** Ir-FeO<sub>x</sub>/ rutile (Ir: 3 wt%, Fe/Ir = 0.1), **c.** Ir-FeO<sub>x</sub>/ rutile (Ir: 3 wt%, Fe/Ir = 0.25), **d.** Ir-FeO<sub>x</sub>/rutile (Ir: 3 wt%, Fe/Ir = 0.5), (b) enlarged part of XRD patterns ( $35^{\circ}$ - $45^{\circ}$ )

All samples were measured after reaction. Reaction conditions: catalyst = 50 mg; substrate: cinnamaldehyde = 6 mmol; solvent: H<sub>2</sub>O = 5 g; reaction temperature = 303 K; reaction time = 2.5 h, H<sub>2</sub> pressure = 0.8 MPa. The catalysts were pretreated before the reaction with liquid phase reduction (8 MPa H<sub>2</sub>, 473 K in the autoclave).

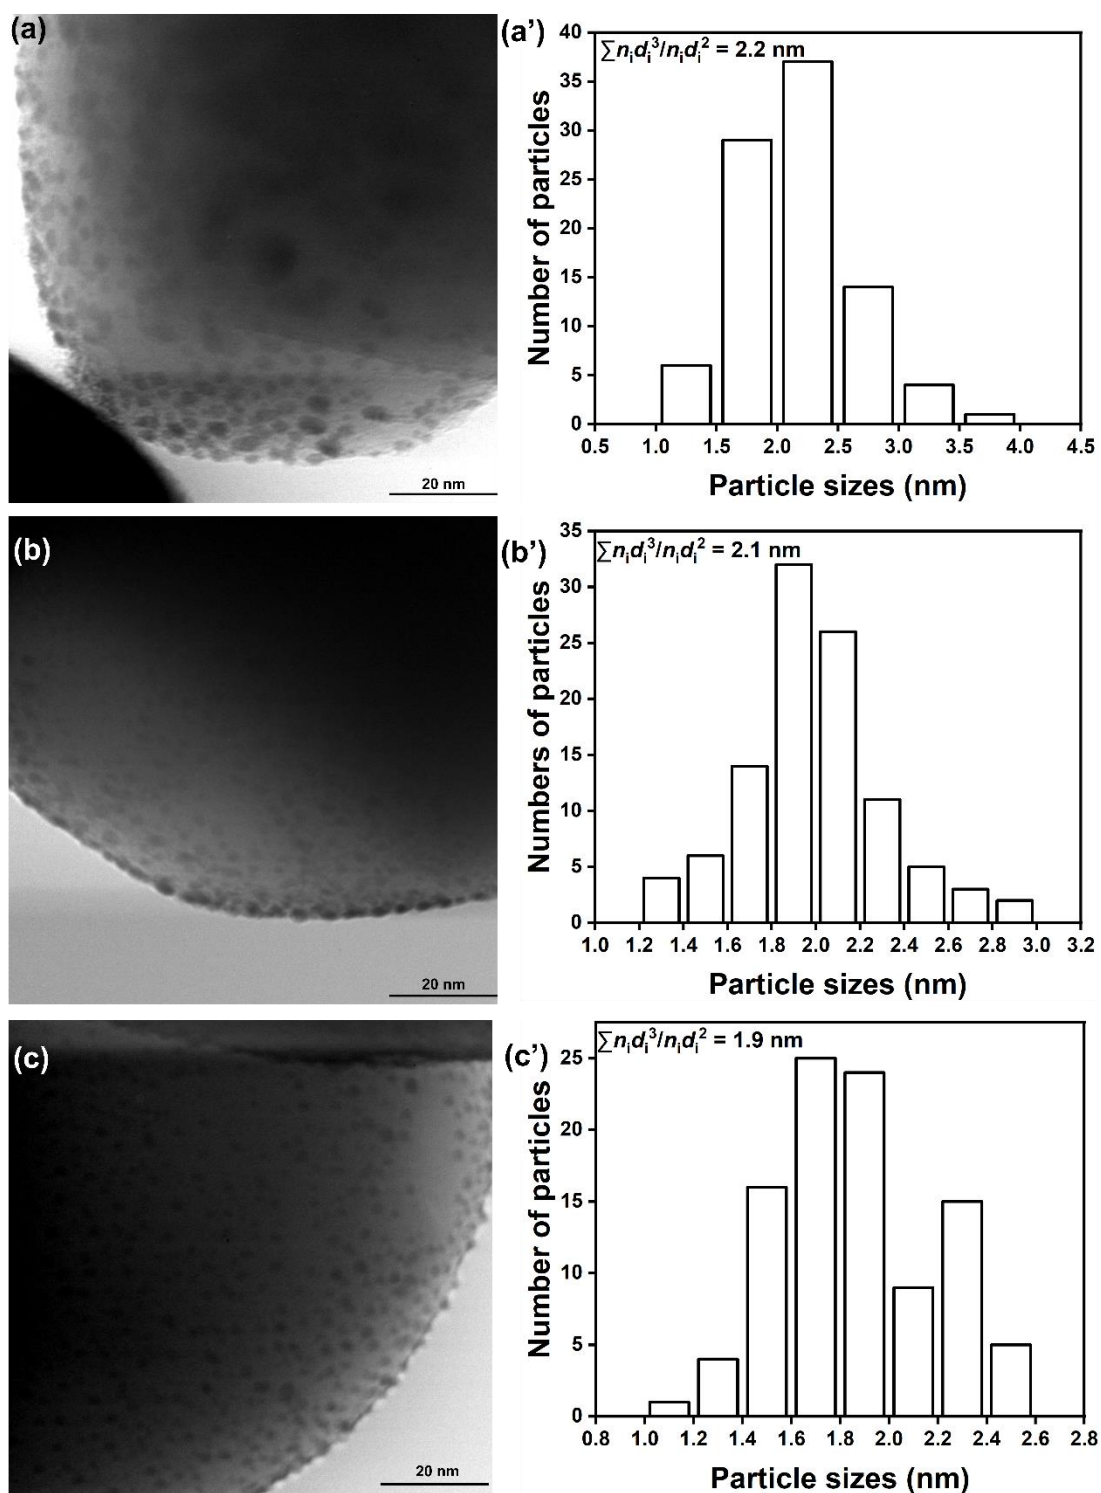

**Figure S2** TEM images (a-c) and particle size distribution (a'-c') of Ir/rutile (Ir: 3 wt%) and Ir-FeO<sub>x</sub>/rutile (Ir: 3 wt%, Fe/Ir = 0.1) with gas phase reduction at different temperatures: (a), (a') G, 473 K; (b), (b') G, 573 K; (c), (c') G, 673 K

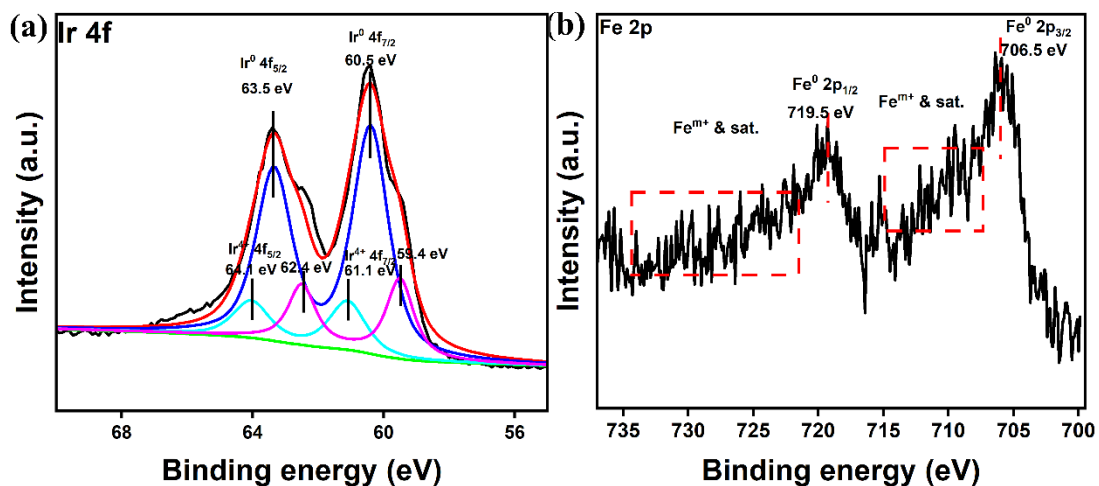

**Figure S3.** XPS of Ir-FeO<sub>x</sub>/rutile (Ir: 3 wt%, Fe/Ir = 0.1) catalyst: (a) Ir 4f spectrum;  
(b) Fe 2p spectrum

Pretreatment method: The Ir-FeO<sub>x</sub>/rutile (Ir: 3 wt%, Fe/Ir = 0.1) catalyst was reduced at 473 K under 8 MPa H<sub>2</sub> in the autoclave (liquid phase reduction)

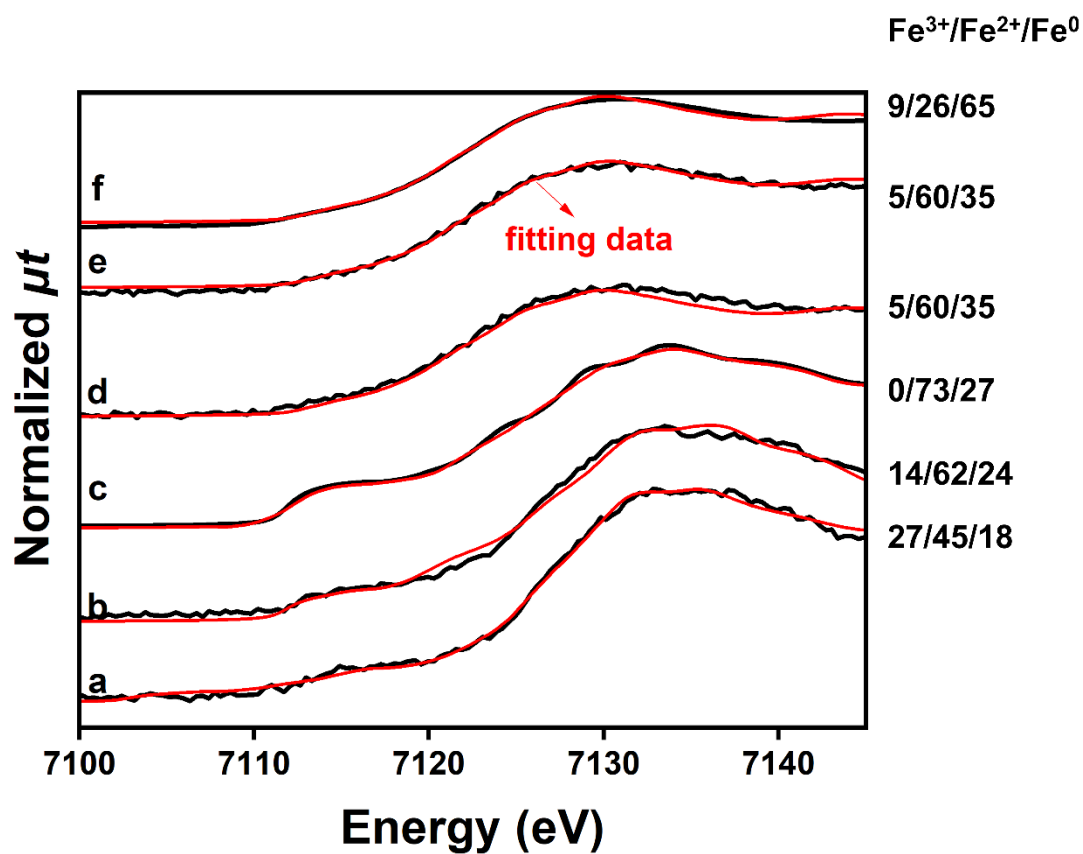

**Figure S4.** Fitting results of Fe K-edge XANES of Ir-FeO<sub>x</sub>/rutile (Ir: 3 wt%, Fe/Ir = 0.1) catalysts with different pre-reduction methods. (a) G, 473 K (b) G, 573 K (c) G, 673 K; (d) L, 473 K (e) L, 473 K after reaction; (f) Ir<sub>c-r</sub>-FeO<sub>x</sub>/rutile (Ir: 5 wt%, Fe/Ir = 0.25; after reaction for 1,2-butanediol hydrogenolysis) reported in our previous work [S1]

(f) was Reproduced from ref. [S1] with permission from the American Chemical Society, copyright 2022.

**Table S16.** Cinnamaldehyde hydrogenation over Ir-FeO<sub>x</sub>/rutile (Ir: 3 wt%, Fe/Ir = 0.1) with different stirring rate during reaction

| Entry | Stirring rate (rpm) | Conv. (%) | Selectivity (%) <sup>a</sup>                                                      |                                                                                   |                                                                                    |        | C.B. (%) |
|-------|---------------------|-----------|-----------------------------------------------------------------------------------|-----------------------------------------------------------------------------------|------------------------------------------------------------------------------------|--------|----------|
|       |                     |           | 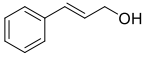 |  |  | Others |          |
| 1     | 100                 | 15        | 97 (15)                                                                           | 2                                                                                 | 1                                                                                  | 0      | 91       |
| 2     | 300                 | 15        | 96 (14)                                                                           | 2                                                                                 | 2                                                                                  | 0      | 95       |
| 3     | 500                 | 17        | 97 (16.5)                                                                         | 2                                                                                 | 1                                                                                  | 0      | 99       |
| 4     | 700                 | 16        | 95 (15)                                                                           | 2                                                                                 | 2                                                                                  | 0      | 95       |
| 5     | 900                 | 15        | 98 (15)                                                                           | 1                                                                                 | 1                                                                                  | 0      | 95       |

Reaction conditions: catalyst = 50 mg; substrate: cinnamaldehyde = 6 mmol; solvent: H<sub>2</sub>O = 5-20 g; reaction temperature = 303 K; reaction time = 0.5 h; H<sub>2</sub> pressure = 0.8 MPa; stirring rate is different. The catalysts were pretreated before the reaction with liquid phase reduction (8 MPa H<sub>2</sub>, 473 K in the autoclave).

<sup>a</sup>Yields (%) of cinnamyl alcohol are given in the parentheses.

**Table S17.** Detailed data of concentration dependence of cinnamaldehyde hydrogenation over Ir /rutile (Ir: 3 wt%) and Ir-FeO<sub>x</sub>/rutile (Ir: 3 wt%, Fe/Ir = 0.1) (**Figure 11 (a)**)

| Entry | Catalyst                 | Solvent amount (g) | Conv. (%) | Selectivity (%)                                                                   |                                                                                    |                                                                                     |        | C.B. (%) |
|-------|--------------------------|--------------------|-----------|-----------------------------------------------------------------------------------|------------------------------------------------------------------------------------|-------------------------------------------------------------------------------------|--------|----------|
|       |                          |                    |           | 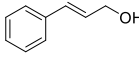 |  |  | Others |          |
| 1     | Ir /rutile               | 5                  | 3.4       | 86 (2.9)                                                                          | 11                                                                                 | 0                                                                                   | 0      | 102      |
| 2     | (Ir: 3 wt%)              | 10                 | 3.6       | 97 (3.3)                                                                          | 1                                                                                  | 0                                                                                   | 1      | 96       |
| 3     |                          | 15                 | 3.7       | 93 (3.4)                                                                          | 5                                                                                  | 1                                                                                   | 0      | 98       |
| 4     |                          | 20                 | 3.0       | 95 (2.9)                                                                          | 3                                                                                  | 0                                                                                   | 1      | 98       |
| 5     | Ir-                      | 5                  | 14.0      | 96 (13.4)                                                                         | 4                                                                                  | 3                                                                                   | 0      | 97       |
| 6     | FeO <sub>x</sub> /rutile | 10                 | 14.2      | 96 (13.6)                                                                         | 3                                                                                  | 2                                                                                   | 0      | 97       |
| 7     | (Ir: 3 wt%,<br>Fe/Ir =   | 15                 | 14.1      | 98 (13.9)                                                                         | 1                                                                                  | 2                                                                                   | 0      | 99       |
| 8     | 0.1)                     | 20                 | 15.0      | 98 (14.7)                                                                         | 1                                                                                  | 1                                                                                   | 1      | 101      |

Reaction conditions: catalyst = 50 mg; substrate: cinnamaldehyde = 6 mmol; solvent: H<sub>2</sub>O = 5-20 g; reaction temperature = 303 K; reaction time = 0.5 h for Ir-FeO<sub>x</sub>/rutile, 1 h for Ir/rutile; H<sub>2</sub> pressure = 0.8 MPa. The catalysts were pretreated before the reaction with liquid phase reduction (8 MPa H<sub>2</sub>, 473 K in the autoclave).

**Table S18.** Detailed data of H<sub>2</sub> pressure dependence of cinnamaldehyde hydrogenation over Ir /rutile (Ir: 3 wt%) and Ir-FeO<sub>x</sub>/rutile (Ir: 3 wt%, Fe/Ir = 0.1) (**Figure 11 (b)**)

| Entry | Catalyst                                                       | H <sub>2</sub><br>pressure<br>(MPa) | Reaction<br>time (h) | Yield (%) | Product<br>Selectivity<br>(%) | C.B. (%) |
|-------|----------------------------------------------------------------|-------------------------------------|----------------------|-----------|-------------------------------|----------|
| 1     | Ir/rutile (Ir:<br>3 wt%)                                       | 0.8                                 | 1                    | 3.1       | 96                            | 94       |
| 2     |                                                                |                                     | 3                    | 20.8      | 96                            | 99       |
| 3     |                                                                |                                     | 4                    | 27.7      | 97                            | 99       |
| 4     | Ir-<br>FeO <sub>x</sub> /rutile<br>(Ir: 3 wt%,<br>Fe/Ir = 0.1) | 1                                   | 1                    | 9.7       | 95                            | 100      |
| 5     |                                                                |                                     | 3                    | 23.0      | 96                            | 100      |
| 6     |                                                                |                                     | 4                    | 29.7      | 96                            | 101      |
| 7     |                                                                |                                     | 0.5                  | 6.7       | 93                            | 100      |
| 8     |                                                                |                                     | 0.7                  | 9.3       | 95                            | 100      |
| 9     |                                                                |                                     | 1                    | 15.4      | 94                            | 100      |
| 10    | Ir-<br>FeO <sub>x</sub> /rutile<br>(Ir: 3 wt%,<br>Fe/Ir = 0.1) | 4                                   | 0.5                  | 7.8       | 94                            | 100      |
| 11    |                                                                |                                     | 0.7                  | 13.5      | 94                            | 100      |
| 12    |                                                                |                                     | 1                    | 23.5      | 95                            | 100      |
| 13    |                                                                |                                     | 0                    | 0.5       | 96                            | 99       |
| 14    | Ir-<br>FeO <sub>x</sub> /rutile<br>(Ir: 3 wt%,<br>Fe/Ir = 0.1) | 0.2                                 | 0.5                  | 2.7       | 93                            | 97       |
| 15    |                                                                |                                     | 1                    | 6.5       | 96                            | 99       |
| 16    |                                                                |                                     | 1.5                  | 9.5       | 97                            | 100      |
| 17    |                                                                |                                     | 0                    | 3.3       | 96                            | 100      |
| 18    | Ir-<br>FeO <sub>x</sub> /rutile<br>(Ir: 3 wt%,<br>Fe/Ir = 0.1) | 0.8                                 | 0.3                  | 9.0       | 97                            | 100      |
| 19    |                                                                |                                     | 0.5                  | 16.9      | 97                            | 99       |
| 20    |                                                                |                                     | 0                    | 3.8       | 98                            | 96       |



|    |   |     |      |    |     |
|----|---|-----|------|----|-----|
| 21 |   | 0.3 | 10.5 | 96 | 99  |
| 22 |   | 0.5 | 20.4 | 96 | 95  |
| 23 | 2 | 0   | 7.4  | 96 | 100 |
| 24 |   | 0.3 | 20.0 | 98 | 100 |
| 25 |   | 0.5 | 36.6 | 96 | 100 |

Reaction conditions: catalyst = 50 mg; substrate: cinnamaldehyde = 6 mmol; solvent: H<sub>2</sub>O = 5 g; reaction temperature = 303 K; reaction time = 2.5 h; H<sub>2</sub> pressure : 0.2-4 MPa. The catalysts were pretreated before the reaction with liquid phase reduction (8 MPa H<sub>2</sub>, 473 K in the autoclave).

## Reference

S1. B. Liu, Y. Nakagawa, C. Li, M. Yabushita and K. Tomishige, *ACS Catal.*, 2022, 12, 15431-15450.
